# Supplementary figures and images for: Infrared frequency-modulation probing of product formation in alkyl + O2 reactions. Part IV.For Part III see ref. 12. Reactions of propyl and butyl radicals with O2Electronic Supplementary Information available. See http://www.rsc.org/suppdata/fd/b1/b102237g/
Source: Royal Society of Chemistry journal article supplement (doi:10.1039/b102237g), 2001-10-19

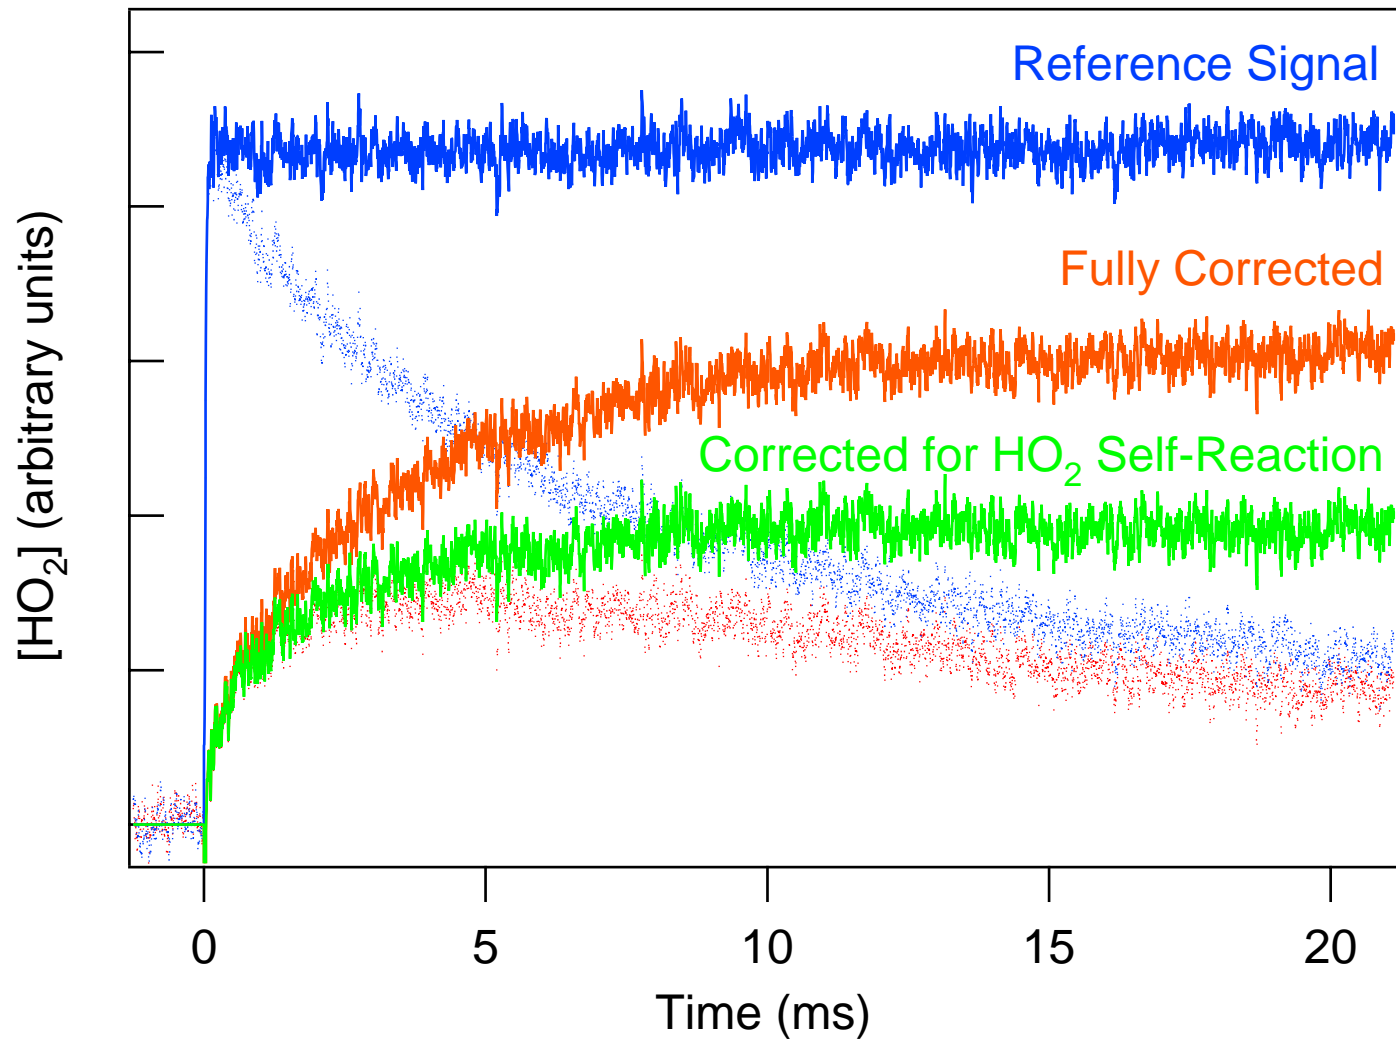

Supplement: figure1.pdf [file figure1.pdf]

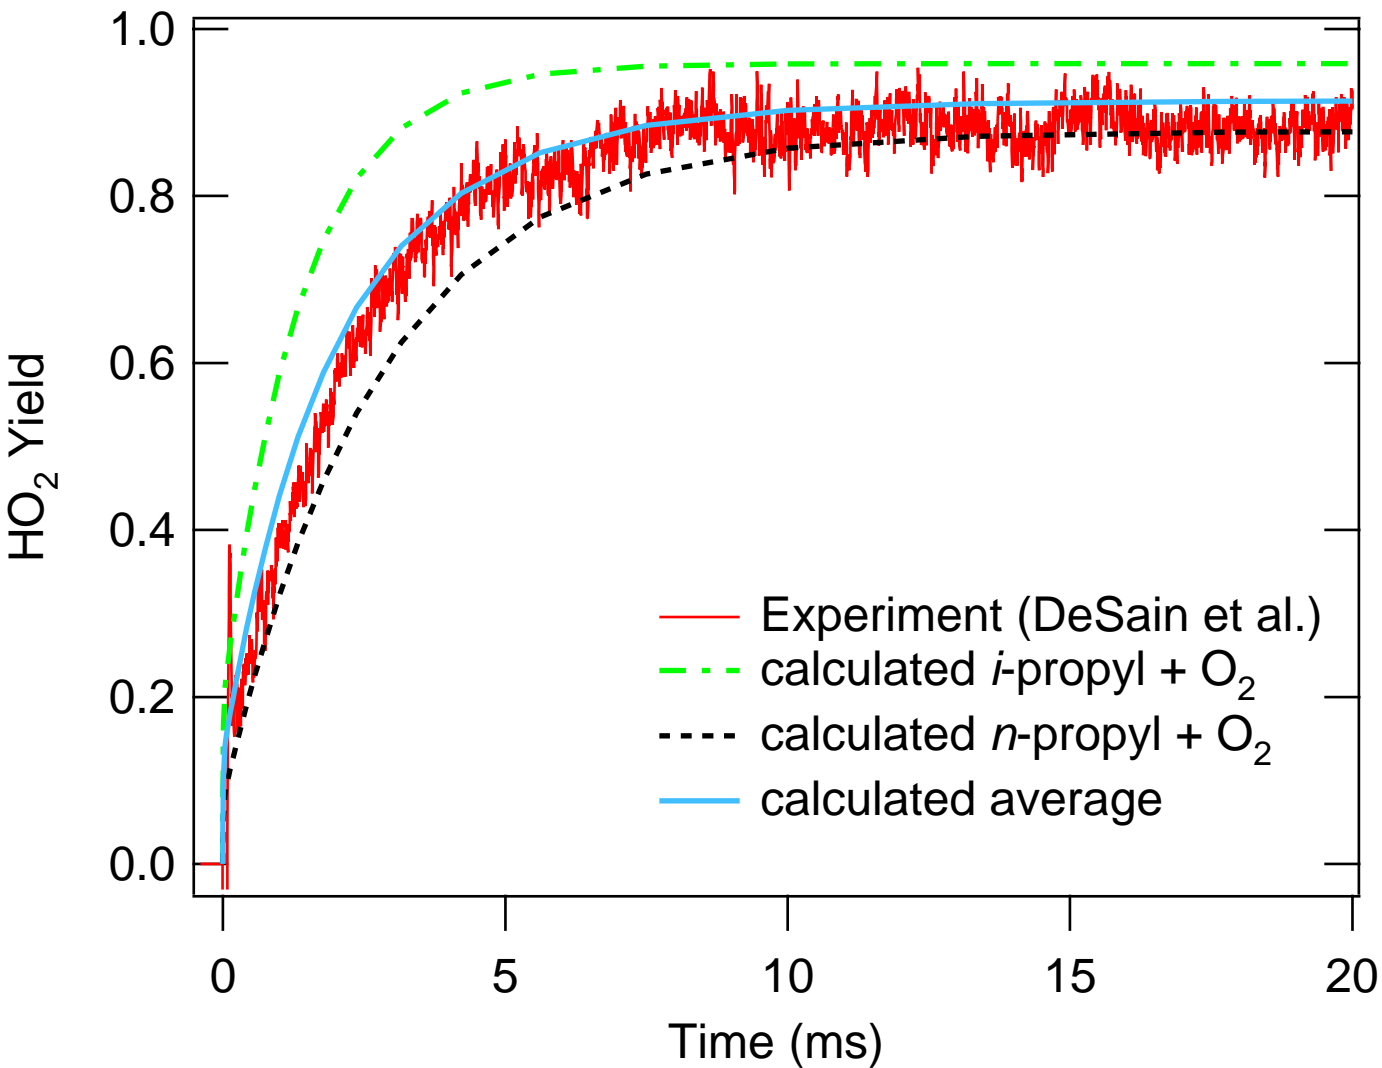

Supplement: figure7.pdf [file figure7.pdf]

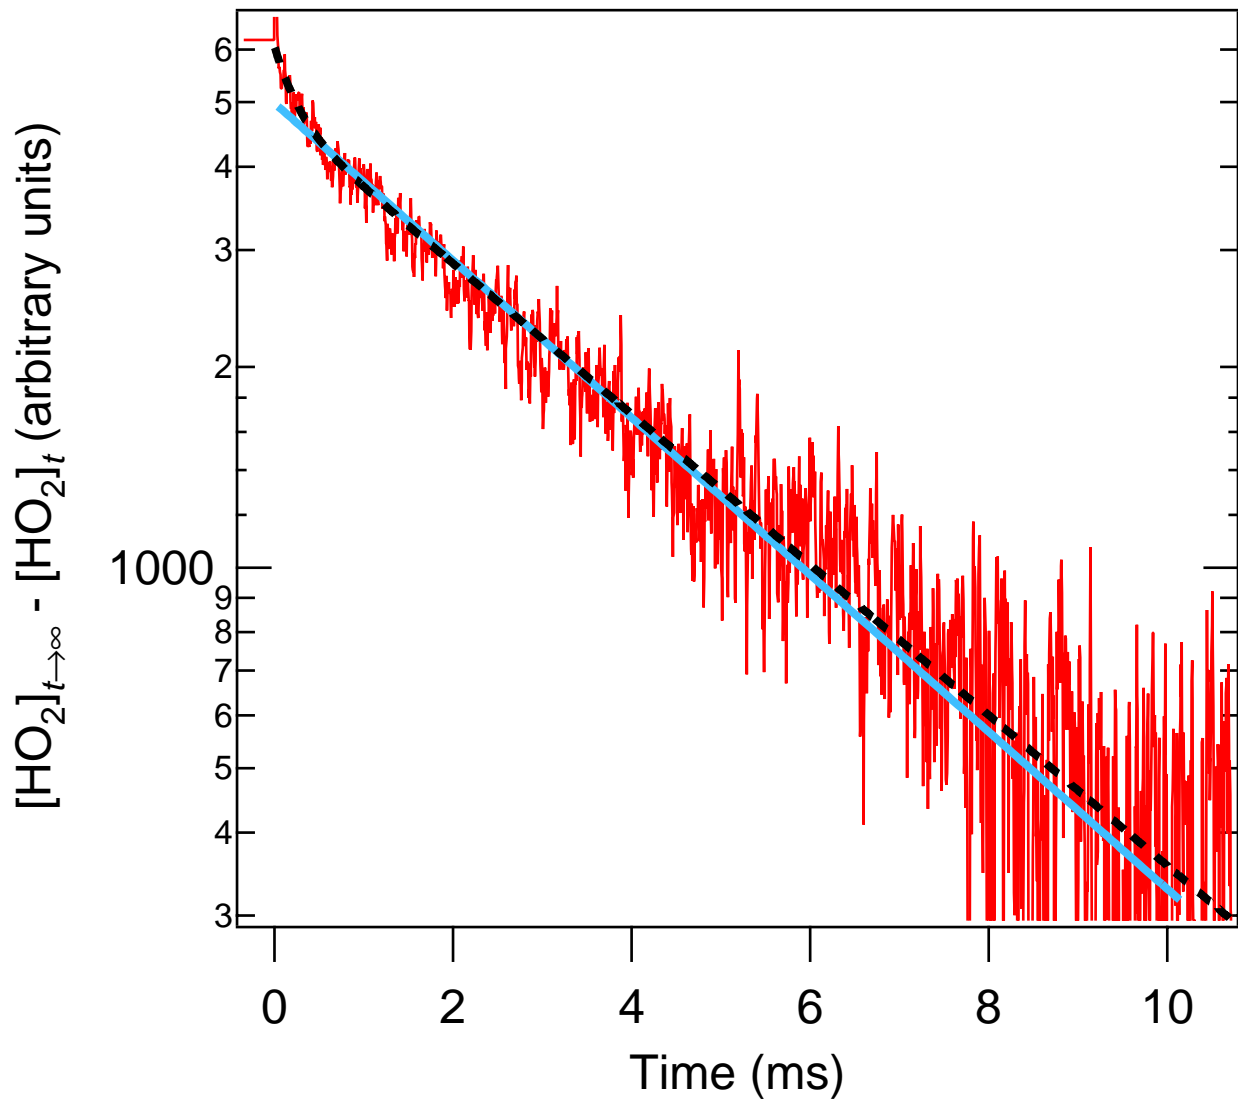

Supplement: figure9.pdf [file figure9.pdf]
